# Supplementary material
Source: MDPI journal article supplement (https://www.mdpi.com/2073-4395/13/1/2)
Supplement: s1 [file s1]

**Supplementary Table S1.** Main plant hormones (pmole mg<sup>-1</sup>) were measured on leaves collected immediately after UV or 7 days after transplanting. Arrows indicate the percentage change between – UV and + UV. One arrow (↑/↓) has been used for difference < ± 40%, two arrows (↑↑/↓↓) have been used for values ≥ ± 40% and ≤ ± 60%, and three arrows (↑↑↑/↓↓↓) have been used for difference > ± 60%. Significant results were reported when the p-value is < 0.05.

| Hormones | - UV<br>after UV | + UV<br>after UV | Trend              | - UV<br>after transplant-<br>ing | + UV<br>after transplant-<br>ing | Trend              |
|----------|------------------|------------------|--------------------|----------------------------------|----------------------------------|--------------------|
| BAP      | 8.7 ± 0.9        | 6.2 ± 1.0        | ↓                  | 11.7 ± 2.8                       | 8.7 ± 1.0                        | ↓                  |
| BA9G     | 3.0 ± 2.1        | 1.2 ± 0.8        | ↓↓↓                | 0.3 ± 0.3                        | 0 ± 0                            | -                  |
| iPA      | 0.1 ± 0.1        | 1.0 ± 0.3        | ↑↑↑                | 0.2 ± 0.2                        | 0 ± 0                            | -                  |
| iP-9-G   | 75.1 ± 6.3       | 33.3 ± 2.5       | ↓↓                 | 44 ± 5.3                         | 21.6 ± 7.3                       | Significant<br>↓↓  |
| ABA      | 11.6 ± 9.6       | 6.4 ± 3.5        | ↓↓                 | 20.2 ± 11.3                      | 4.5 ± 4.5                        | ↓↓↓                |
| IAA      | 243 ± 132        | 75.2 ± 28.2      | ↓↓↓                | 3.9 ± 0.7                        | 4.3 ± 1.8                        | ↑                  |
| IAA-C    | 381 ± 237        | 5.6 ± 3.0        | Significant<br>↓↓↓ | 26.7 ± 12.1                      | 7.0 ± 3.8                        | ↓↓↓                |
| GA3      | 19.5 ± 5.0       | 13.6 ± 4.8       | ↓                  | 27.2 ± 3.8                       | 10.2 ± 2.6                       | Significant<br>↓↓↓ |
| GA19     | 10.0 ± 0.9       | 37.5 ± 31.2      | ↑↑↑                | 22.6 ± 8.8                       | 9.9 ± 1.4                        | ↓↓↓                |
| GA7      | 390 ± 52         | 221 ± 57         | ↓↓                 | 279.6 ± 71.7                     | 374 ± 48                         | ↑                  |
| GA15     | 261 ± 37         | 358 ± 144        | ↑                  | 313 ± 32                         | 1015 ± 716                       | ↑↑↑                |

## Hormones in stems

**Supplementary Table S2.** Main plant hormones (pmole mg<sup>-1</sup>) were measured on stems collected immediately after UV or 7 days after transplanting. Arrows indicate the percentage change between – UV and + UV. One arrow (↑/↓) has been used for difference < ± 40%, two arrows (↑↑/↓↓) have been used for values ≥ ± 40% and ≤ ± 60%, and three arrows (↑↑↑/↓↓↓) have been used for difference > ± 60%. Significant results were reported when the p-value is < 0.05.

| <i>Hormones</i> | <i>- UV</i><br><i>after UV</i> | <i>+ UV</i><br><i>after UV</i> | <i>Trend</i>       | <i>- UV</i><br><i>after transplant-</i><br><i>ing</i> | <i>+ UV</i><br><i>after transplant-</i><br><i>ing</i> | <i>Trend</i> |
|-----------------|--------------------------------|--------------------------------|--------------------|-------------------------------------------------------|-------------------------------------------------------|--------------|
| <i>BAP</i>      | 6.7 ± 0.1                      | 8.2 ± 1.3                      | ↑                  | 7.3 ± 1.4                                             | 6.9 ± 1.0                                             | ↓            |
| <i>BA9G</i>     | 5.7 ± 2.4                      | 6.6 ± 4.1                      | ↑                  | 1.4 ± 1.0                                             | 1.1 ± 0.5                                             | ↓            |
| <i>iPA</i>      | 0.9 ± 0.4                      | 5.6 ± 2.3                      | ↑↑↑                | 1.3 ± 0.1                                             | 1.0 ± 0.1                                             | ↓            |
| <i>iP-9-G</i>   | 32.9 ± 3.7                     | 26.4 ± 5.7                     | ↓                  | 12.4 ± 1.8                                            | 8.9 ± 1.7                                             | ↓            |
| <i>ABA</i>      | 4.0 ± 2.5                      | 0.7 ± 0.7                      | ↓↓↓                | 10.5 ± 6.7                                            | 4.0 ± 4.0                                             | ↓↓↓          |
| <i>IAA</i>      | 126 ± 61                       | 29.2 ± 8.2                     | ↓↓↓                | 5.3 ± 1.3                                             | 5.9 ± 2.3                                             | ↑            |
| <i>IAA-C</i>    | 277 ± 148                      | 10.5 ± 5.2                     | ↓↓↓                | 7.0 ± 2.4                                             | 4.6 ± 2.3                                             | ↓↓           |
| <i>GA3</i>      | 19.8 ± 3.3                     | 18.9 ± 3.3                     | ↓                  | 16.2 ± 3.0                                            | 13.8 ± 1.5                                            | ↓            |
| <i>GA19</i>     | 30.7 ± 2.5                     | 39.3 ± 11.7                    | ↑                  | 56.5 ± 3.6                                            | 61.2 ± 5.3                                            | ↑            |
| <i>GA7</i>      | 160 ± 20                       | 287 ± 36                       | Significant<br>↑↑↑ | 245 ± 18                                              | 279 ± 22                                              | ↑            |
| <i>GA15</i>     | 833 ± 523                      | 818 ± 433                      | ↓                  | 621 ± 159                                             | 794 ± 300                                             | ↑            |

## Hormones in roots

**Supplementary Table S3.** Main plant hormones (pmole mg<sup>-1</sup>) were measured on roots collected immediately after UV or 7 days after transplanting. Arrows indicate the percentage change between – UV and + UV. One arrow (↑/↓) has been used for difference < ± 40 %, two arrows (↑↑/↓↓) have been used for values ≥ ± 40 % and ≤ ± 60 %, and three arrows (↑↑↑/↓↓↓) have been used for difference > ± 60 %. Significant results were reported when the p-value is < 0.05.

| <i>Hormones</i> | <i>- UV</i><br><i>after UV</i> | <i>+ UV</i><br><i>after UV</i> | <i>Trend</i>       | <i>- UV</i><br><i>after trans-<br/>planting</i> | <i>+ UV</i><br><i>after transplant-<br/>ing</i> | <i>Trend</i>     |
|-----------------|--------------------------------|--------------------------------|--------------------|-------------------------------------------------|-------------------------------------------------|------------------|
| <i>BAP</i>      | 8.1 ± 1.7                      | 5.3 ± 1.2                      | ↓                  | 11.5 ± 2.3                                      | 8.5 ± 1.1                                       | ↓                |
| <i>BA9G</i>     | 81 ± 46                        | 163 ± 107                      | ↑↑↑                | 74.7 ± 29.3                                     | 142 ± 51                                        | ↑↑↑              |
| <i>iPA</i>      | 0.0 ± 0.0                      | 0.3 ± 0.2                      | -                  | 1.5 ± 0.4                                       | 1.0 ± 0.1                                       | ↓                |
| <i>iP-9-G</i>   | 15.0 ± 3.0                     | 7.5 ± 0.8                      | ↓↓                 | 8.6 ± 0.7                                       | 7.0 ± 1.3                                       | ↓                |
| <i>ABA</i>      | 1.7 ± 1.0                      | 0.4 ± 0.4                      | ↓↓↓                | 3.4 ± 3.0                                       | 1.6 ± 1.6                                       | ↓↓↓              |
| <i>IAA</i>      | 126 ± 65                       | 11.8 ± 3.4                     | Significant<br>↓↓↓ | 4.4 ± 0.6                                       | 5.9 ± 1.9                                       | ↑                |
| <i>IAA-C</i>    | 99 ± 62                        | 3.5 ± 0.8                      | Significant<br>↓↓↓ | 3.2 ± 0.4                                       | 1.0 ± 2.0                                       | ↓                |
| <i>GA3</i>      | 20.9 ± 4.9                     | 16.9 ± 2.0                     | ↓                  | 21.1 ± 1.4                                      | 15.7 ± 1.2                                      | Significant<br>↓ |
| <i>GA19</i>     | 4.4 ± 0.5                      | 4.9 ± 0.9                      | ↑                  | 3.9 ± 0.5                                       | 4.1 ± 0.8                                       | ↑                |
| <i>GA7</i>      | 61.7 ± 8.7                     | 62.0 ± 12.4                    | ↑                  | 145 ± 14                                        | 154 ± 16                                        | ↑                |
| <i>GA15</i>     | 673 ± 406                      | 407 ± 98                       | ↓↓↓                | 359 ± 63                                        | 338 ± 72                                        | ↓                |
